# Supplementary material
Source: PubMed Central journal article supplement (PMC3809029)
Supplement: NIHMS518762-supplement-1.pdf [file NIHMS518762-supplement-1.pdf]

## **eAPPENDIX**

### **Case fatality risk of influenza A(H1N1pdm09): a systematic review**

This appendix provides additional information on the data.

eTable: Articles excluded after reviewing the full-length text.

| First Author          | Journal                   | Year | Title                                                                                                                                                   | Reason for Exclusion                                                                             |
|-----------------------|---------------------------|------|---------------------------------------------------------------------------------------------------------------------------------------------------------|--------------------------------------------------------------------------------------------------|
|                       | J Indian Med Assoc        | 2009 | Epidemiology of seasonal, avian and pandemic influenza                                                                                                  | Paper not found.                                                                                 |
|                       | Wkly Epidemiol Rec        | 2009 | Transmission dynamics and impact of pandemic influenza A (H1N1) 2009 virus                                                                              | CFR not reported, only population-based mortality rate reported.                                 |
|                       | Euro Surveill             | 2009 | Progression and impact of the first winter wave of the 2009 pandemic H1N1 influenza in New South Wales, Australia                                       | CFR not reported, only population-based mortality rate reported.                                 |
|                       | Wkly Epidemiol Rec        | 2009 | Considerations for assessing the severity of an influenza pandemic                                                                                      | CFR not reported.                                                                                |
|                       | MMWR Morb Mortal Wkly Rep | 2010 | Deaths and hospitalizations related to 2009 pandemic influenza A (H1N1) - Greece, May 2009-February 2010                                                | CFR not reported, only population-based mortality rate reported.                                 |
| Adalja, A. A.         | JAMA                      | 2011 | Comparing severity and outcomes for seasonal and 2009 H1N1 infections                                                                                   | Letter, not an original study.                                                                   |
| Archer, B.            | Euro Surveill             | 2009 | Interim report on pandemic H1N1 influenza virus infections in South Africa, April to October 2009: epidemiology and factors associated with fatal cases | Only the number of cases and deaths reported, not describe explicitly as an estimate of the CFR. |
| Armstrong, G. L.      | Clin Infect Dis           | 2011 | Timely assessment of the severity of the 2009 H1N1 influenza pandemic                                                                                   | CFR not reported.                                                                                |
| Azziz-Baumgartner, E. | Bull World Health Organ   | 2012 | Incidence of influenza-like illness and severe acute respiratory infection during three influenza seasons in Bangladesh, 2008-2010                      | CFR not reported.                                                                                |
| Azziz-Baumgartner, E. | PLoS One                  | 2012 | Mortality, Severe Acute Respiratory Infection, and Influenza-Like Illness Associated with Influenza A(H1N1)pdm09 in Argentina, 2009                     | CFR not reported, only population-based mortality rate reported.                                 |
| Babak, A.             | Clin Microbiol Infect     | 2010 | Epidemiological and clinical characteristics of influenza A (H1N1) V infection in Isfahan, Iran, July-October 2009                                      | Conference abstract, not an original study.                                                      |
| Baguelin, M.          | Vaccine                   | 2010 | Vaccination against pandemic influenza A/H1N1v in England: a real-time economic evaluation                                                              | CFR not reported.                                                                                |
| Baguelin, M.          | PLoS One                  | 2011 | Age-specific incidence of A/H1N1 2009 influenza infection in England from                                                                               | CFR not reported.                                                                                |

|                          |                            |      |                                                                                                                                                    |                                                                  |
|--------------------------|----------------------------|------|----------------------------------------------------------------------------------------------------------------------------------------------------|------------------------------------------------------------------|
| Bishop, J. F.            | N Engl J Med               | 2009 | sequential antibody prevalence data using likelihood-based estimation<br>Australia's winter with the 2009 pandemic influenza A (H1N1) virus        | CFR not reported.                                                |
| Boisson, E. V.           | West Indian Med J          | 2012 | Pandemic influenza A (H1N1) 2009 in the English and Dutch-speaking Caribbean: An epidemiological overview                                          | Conference abstract, not an original study.                      |
| Borja-Aburto, V. H.      | Arch Med Res               | 2012 | Epidemiological Characterization of a Fourth Wave of Pandemic A/H1N1 Influenza in Mexico, Winter 2011-2012: Age Shift and Severity                 | CFR not reported, only hospitalization fatality risk reported.   |
| Bunthi, C.               | PLoS One                   | 2013 | Influenza A(H1N1)pdm09-associated pneumonia deaths in Thailand                                                                                     | CFR not reported, only hospitalization fatality risk reported.   |
| Carvalhanas, T. R. M. P. | Int J Infect Diseases      | 2010 | Epidemiological profile of the A (H1N1) pandemic influenza in the state of Sao Paulo, Brazil, for the April-September 2009 timeframe               | Conference abstract, not an original study.                      |
| Chowell, G.              | PLoS Curr                  | 2012 | Recrudescence wave of pandemic A/H1N1 influenza in Mexico, winter 2011-2012: Age shift and severity                                                | CFR not reported, only hospitalization fatality risk reported.   |
| Chowell, G.              | PLoS One                   | 2011 | Spatial and temporal characteristics of the 2009 A/H1N1 influenza pandemic in Peru                                                                 | CFR not reported.                                                |
| Cimolai, N.              | CMAJ                       | 2010 | The severity of H1N1                                                                                                                               | Letter, not an original study.                                   |
| Clark, N. M.             | Semin Respir Crit Care Med | 2011 | Influenza: epidemiology, clinical features, therapy, and prevention                                                                                | CFR reported, but not from empirical data.                       |
| Colizza, V.              | PLoS Curr                  | 2009 | Estimate of Novel Influenza A/H1N1 cases in Mexico at the early stage of the pandemic with a spatially structured epidemic model                   | CFR not reported.                                                |
| Collignon, P. J.         | Med J Aust                 | 2010 | A pandemic response to a disease of predominantly seasonal intensity                                                                               | Letter, not an original study.                                   |
| Correia, A. M.           | Rev Port Pneumol           | 2010 | Pandemic influenza A (H1N1) in the North of Portugal: how did the autumn-winter wave behave?                                                       | CFR not reported, only population-based mortality rate reported. |
| Dellagi, K.              | PLoS One                   | 2011 | Pandemic influenza due to pH1N1/2009 virus: estimation of infection burden in Reunion Island through a prospective serosurvey, austral winter 2009 | CFR not reported.                                                |

|                  |                                 |      |                                                                                                                                                   |                                                                |
|------------------|---------------------------------|------|---------------------------------------------------------------------------------------------------------------------------------------------------|----------------------------------------------------------------|
| Donaldson, L. J. | BMJ<br>(Online)                 | 2010 | Mortality from pandemic A/H1N1 2009 influenza in England: Public health surveillance study                                                        | Duplicate publication.                                         |
| Donaldson, L. J. | BMJ                             | 2010 | English mortality from A/H1N1. Comparisons with recent flu mortality                                                                              | Letter, not an original study.                                 |
| D'Ortenzio, E.   | Clin Microbiol Infect           | 2010 | A review of the dynamics and severity of the pandemic A(H1N1) influenza virus on Reunion island, 2009                                             | More complete report of the study published elsewhere [1].     |
| Duque, V.        | Rev Port Pneumol                | 2010 | The early days of pandemic (H1N1) 2009 virus infection in the central region of Portugal                                                          | CFR not reported.                                              |
| Falagas, M. E.   | Eur J Clin Microbiol Infect Dis | 2010 | Epidemiological aspects of 2009 H1N1 influenza: the accumulating experience from the Northern Hemisphere                                          | Review, not an original study.                                 |
| Falagas, M. E.   | Epidemiol Infect                | 2011 | Pandemic A(H1N1) 2009 influenza: review of the Southern Hemisphere experience                                                                     | Review, not an original study.                                 |
| Fowler, R. A.    | Lancet                          | 2010 | Paediatric mortality related to H1N1 infection in England                                                                                         | CFR not reported.                                              |
| Fowlkes, A. L.   | Clin Infect Dis                 | 2011 | Epidemiology of 2009 pandemic influenza A (H1N1) deaths in the United States, April-July 2009                                                     | CFR not reported.                                              |
| Gooya, M. M.     | Arch Iran Med                   | 2010 | Influenza A (H1N1) pandemic in Iran: report of first confirmed cases from June to November 2009                                                   | CFR not reported, only number of death and case reported.      |
| Gouya, M. M.     | Iran Red Crescent Med J         | 2011 | Mortality from Pandemic Influenza A (H1N1) in Iran                                                                                                | CFR not reported, only hospitalization fatality risk reported. |
| Hardelid, P.     | Health Technol Assess           | 2010 | Assessment of baseline age-specific antibody prevalence and incidence of infection to novel influenza A/H1N1 2009                                 | CFR not reported.                                              |
| Hardelid, P.     | Influenza Other Respi Viruses   | 2012 | Mortality caused by influenza and respiratory syncytial virus by age group in England and Wales 1999-2010                                         | CFR not reported.                                              |
| Jhung, M. A.     | Influenza Other Respi Viruses   | 2011 | Preliminary results of 2009 pandemic influenza surveillance in the United States using the Aggregate Hospitalization and Death Reporting Activity | CFR not reported.                                              |
| Josseran, L.     | Euro Surveill                   | 2010 | Estimating the impact of the 2009 influenza A(H1N1) pandemic on mortality in the elderly in Navarre, Spain                                        | CFR not reported.                                              |

|                     |                               |      |                                                                                                                                                              |                                                                  |
|---------------------|-------------------------------|------|--------------------------------------------------------------------------------------------------------------------------------------------------------------|------------------------------------------------------------------|
| Kao, T. M.          | Emerg Infect Dis              | 2010 | Rapid diagnostic tests and severity of illness in pandemic (H1N1) 2009, Taiwan                                                                               | CFR not reported.                                                |
| Karpova, L. S.      | Vopr Virusol                  | 2012 | [An influenza pandemic in Russia as a part of a global spread of the influenza A(H1N1)pdm09 in 2009-2011]                                                    | Paper not found                                                  |
| Khan, G.            | Emerg Infect Dis              | 2011 | Pandemic (H1N1) 2009, Abu Dhabi, United Arab Emirates, May 2009-March 2010                                                                                   | CFR not reported, only population-based mortality rate reported. |
| Khandaker, G.       | Influenza Other Respi Viruses | 2011 | Systematic review of clinical and epidemiological features of the pandemic influenza A (H1N1) 2009                                                           | Review, not an original study.                                   |
| Larrauri Camara, A. | Rev Esp Salud Publica         | 2010 | [Surveillance of influenza pandemic (H1N1)2009 in Spain]                                                                                                     | More complete report of the study published elsewhere [2].       |
| McLeish, N. J.      | PLoS One                      | 2011 | Sero-prevalence and incidence of A/H1N1 2009 influenza infection in Scotland in winter 2009-2010                                                             | CFR not reported.                                                |
| Molbak, K.          | Vaccine                       | 2011 | Burden of illness of the 2009 pandemic of influenza A (H1N1) in Denmark                                                                                      | CFR not reported.                                                |
| Moral, L.           | Enferm Infecc Microbiol Clin  | 2011 | Burden of severe 2009 pandemic influenza A (H1N1) infection in children in Southeast Spain                                                                   | CFR not reported.                                                |
| Muscatello, D. J.   | Emerg Infect Dis              | 2010 | All-cause mortality during first wave of pandemic (H1N1) 2009, New South Wales, Australia, 2009                                                              | CFR not reported.                                                |
| Nishiura, H.        | Lancet Infect Dis             | 2010 | Case fatality ratio of pandemic influenza                                                                                                                    | CFR reported, but not from empirical data.                       |
| Offenstadt, G.      | Crit Care Med                 | 2011 | Severity of pH1N1 influenza A                                                                                                                                | Letter, not an original study.                                   |
| Petrovic, V.        | Croat Med J                   | 2011 | Overview of the winter wave of 2009 pandemic influenza A(H1N1)v in Vojvodina, Serbia                                                                         | CFR not reported, only hospitalization fatality risk reported.   |
| Poeppl, W.          | Infection                     | 2011 | Clinical aspects of 2009 pandemic influenza A (H1N1) virus infection in Austria                                                                              | CFR not reported, only hospitalization fatality risk reported.   |
| Poggensee, G.       | BMC Infect Dis                | 2010 | The prior to the end of the prior to the end of the first year of the pandemic of pandemic influenza (H1N1) 2009 in Germany: from initiation to acceleration | CFR not reported.                                                |
| Ponnambalam, L.     | Intl J Infect Diseases        | 2012 | Age-stratified transmission dynamic models to assess severity of influenza                                                                                   | Conference abstract, not an original study.                      |

|                      |                                     |      |                                                                                                                                                                                                      |                                                                |
|----------------------|-------------------------------------|------|------------------------------------------------------------------------------------------------------------------------------------------------------------------------------------------------------|----------------------------------------------------------------|
| Presanis, A. M.      | PLoS Curr                           | 2009 | pandemics in real-time<br>The severity of pandemic H1N1 influenza in the United States, April - July 2009                                                                                            | More complete report of the study published elsewhere [3].     |
| Reyes, L.            | Influenza<br>Other Respi<br>Viruses | 2010 | Population-based surveillance for 2009 pandemic influenza A (H1N1) virus in Guatemala, 2009                                                                                                          | CFR not reported, only hospitalization fatality risk reported. |
| Rodriguez-Valero, M. | J Infect Dev<br>Ctries              | 2012 | Difference between early clinical features of swine origin A H1N1 influenza confirmed and not confirmed infection in Mexico                                                                          | CFR not reported, only hospitalization fatality risk reported. |
| Roriz-Cruz, M.       | J Am Geriatr<br>Soc                 | 2010 | Lower mortality from H1N1 influenza in older Argentineans: men more affected                                                                                                                         | CFR not reported.                                              |
| Shen, J.             | Virology J                          | 2012 | Epidemiologic parameters and evaluation of control measure for 2009 novel influenza a (H1N1) in Xiamen, Fujian Province, China                                                                       | CFR not reported.                                              |
| Shrestha, S. S.      | Clin Infect<br>Dis                  | 2011 | Estimating the burden of 2009 pandemic influenza A (H1N1) in the United States (April 2009-April 2010)                                                                                               | CFR not reported, only hospitalization fatality risk reported. |
| Smoljanovic, M.      | Croat Med J                         | 2011 | Predicting AH1N1 2009 influenza epidemic in Southeast Europe                                                                                                                                         | CFR not reported.                                              |
| Van Kerkhove, M. D.  | Influenza<br>Other Respi<br>Viruses | 2011 | Epidemiologic and virologic assessment of the 2009 influenza A (H1N1) pandemic on selected temperate countries in the Southern Hemisphere: Argentina, Australia, Chile, New Zealand and South Africa | CFR not reported, only hospitalization fatality risk reported. |
| Van Kerkhove, M. D.  | Influenza<br>Other Respi<br>Viruses | 2013 | Estimating age-specific cumulative incidence for the 2009 influenza pandemic: a meta-analysis of A(H1N1)pdm09 serological studies from 19 countries                                                  | Meta-analysis, not an original study.                          |
| von Kries, R.        | PLoS One                            | 2011 | Post-pandemic seroprevalence of pandemic influenza A (H1N1) 2009 infection (swine flu) among children <18 years in Germany                                                                           | CFR not reported.                                              |
| Wu, J. T.            | PLoS Med                            | 2011 | Estimating infection attack rates and severity in real time during an influenza pandemic: analysis of serial cross-sectional serologic                                                               | CFR not reported.                                              |

|               |                                     |      |                                                                                                                                                                                                                                                                                     |                                                |
|---------------|-------------------------------------|------|-------------------------------------------------------------------------------------------------------------------------------------------------------------------------------------------------------------------------------------------------------------------------------------|------------------------------------------------|
| Wu, J. T.     | Influenza<br>Other Respi<br>Viruses | 2011 | surveillance data<br>A serial cross-sectional<br>serologic survey of 2009<br>Pandemic (H1N1) in Hong<br>Kong: implications for<br>future pandemic influenza<br>surveillance                                                                                                         | Duplicate publication.                         |
| Wu, J. T.     | Intl J Infect<br>Diseases           | 2012 | Characterizing the<br>transmission dynamics and<br>severity of 2009 H1N1<br>influenza pandemic in Hong<br>Kong                                                                                                                                                                      | Conference abstract, not<br>an original study. |
| Yoshikura, H. | Jpn J Infect<br>Dis                 | 2011 | A new method for<br>monitoring and forecasting<br>the case-fatality rate in<br>ongoing epidemics and its<br>evaluation using published<br>data of SARS in 2003, H1N1<br>pandemic in 2009/2010,<br>hand-foot-mouth disease in<br>China in 2009/2010, and<br>cholera in Haiti in 2010 | CFR not reported.                              |
| Zhang, X.     | PLoS One                            | 2011 | Serologic survey of the<br>pandemic H1N1 2009 virus<br>in Guangdong Province,<br>China: a cross sectional<br>study                                                                                                                                                                  | CFR not reported.                              |

---

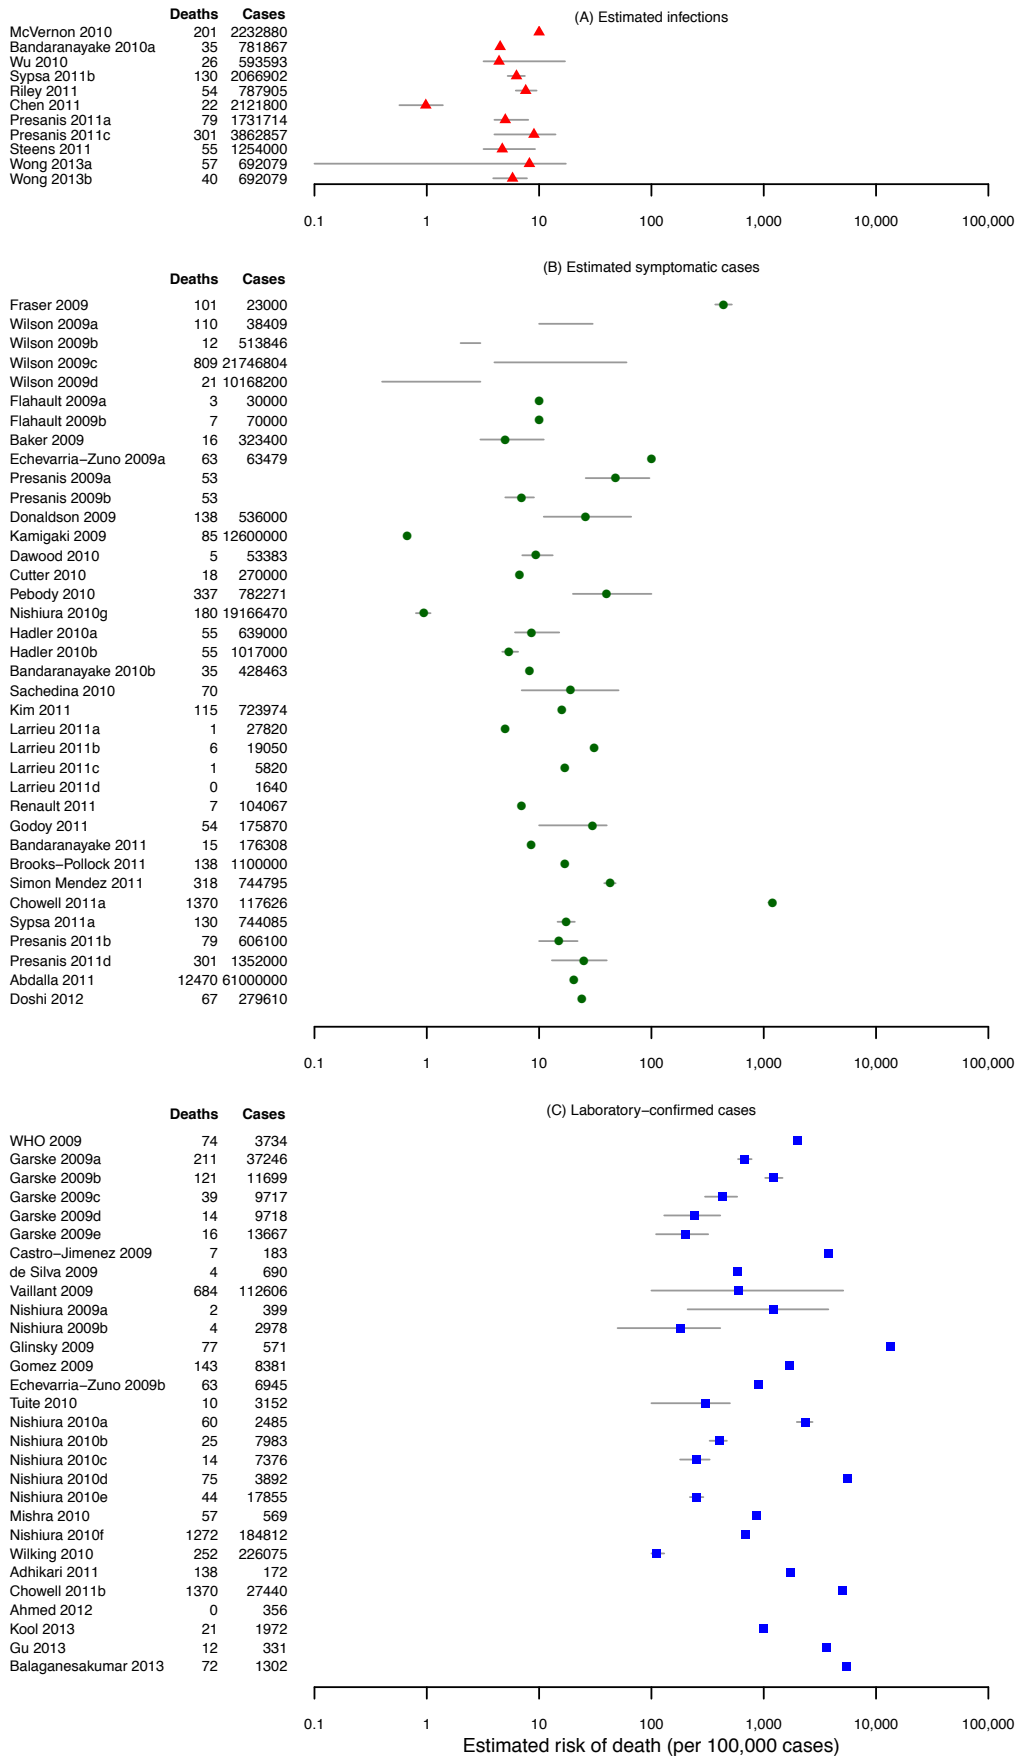

eFigure 1: Overall estimated risk of death, by definition of cases.



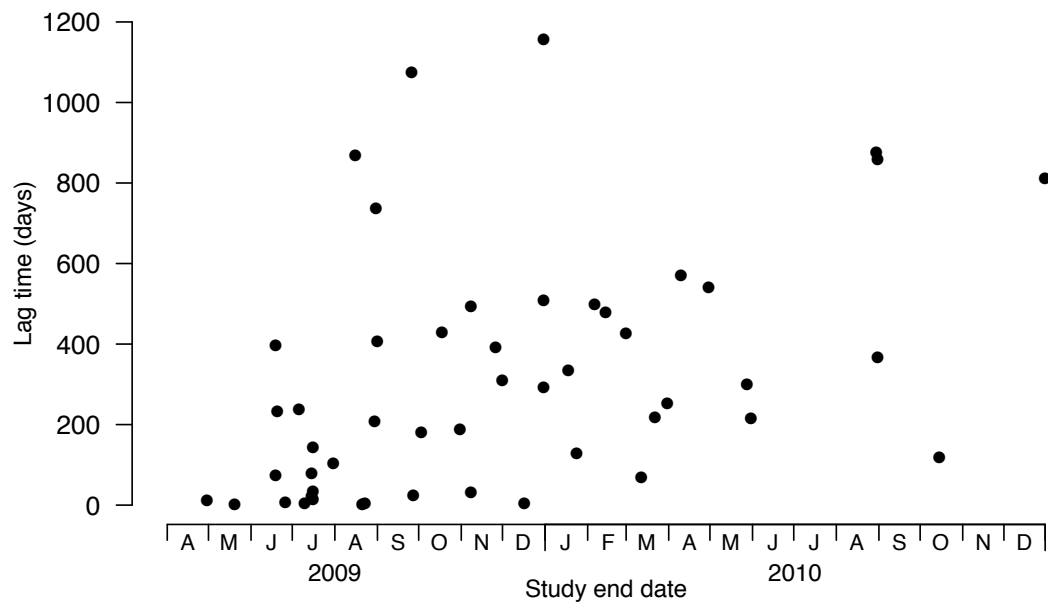

eFigure 2: Lag time between end of study period to publication date.

## APPENDIX REFERENCES

1. Renault P, Thouillot F, Do C, et al. [Epidemic of influenza A(H1N1) 2009 in Reunion Island: epidemiological data]. *Bull Soc Pathol Exot* 2011;104(2):108-13. doi:10.1007/s13149-010-0113-5.
2. Simon Mendez L, de Mateo Ontanon S, Larrauri Camara A, et al. [Transmissibility and severity of the pandemic influenza A (H1N1) 2009 virus in Spain]. *Gac Sanit* 2011;25(4):296-302. doi:10.1016/j.gaceta.2011.02.008.
3. Presanis AM, De Angelis D, Hagy A, et al. The severity of pandemic H1N1 influenza in the United States, from April to July 2009: a Bayesian analysis. *PLoS Med* 2009;6(12):e1000207. doi:10.1371/journal.pmed.1000207.

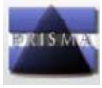

# PRISMA 2009 Checklist

| Section/topic                      | #  | Checklist item                                                                                                                                                                                                                                                                                              | Reported on page # |
|------------------------------------|----|-------------------------------------------------------------------------------------------------------------------------------------------------------------------------------------------------------------------------------------------------------------------------------------------------------------|--------------------|
| <b>TITLE</b>                       |    |                                                                                                                                                                                                                                                                                                             |                    |
| Title                              | 1  | Identify the report as a systematic review, meta-analysis, or both.                                                                                                                                                                                                                                         | 1                  |
| <b>ABSTRACT</b>                    |    |                                                                                                                                                                                                                                                                                                             |                    |
| Structured summary                 | 2  | Provide a structured summary including, as applicable: background; objectives; data sources; study eligibility criteria, participants, and interventions; study appraisal and synthesis methods; results; limitations; conclusions and implications of key findings; systematic review registration number. | 2, 3               |
| <b>INTRODUCTION</b>                |    |                                                                                                                                                                                                                                                                                                             |                    |
| Rationale                          | 3  | Describe the rationale for the review in the context of what is already known.                                                                                                                                                                                                                              | 4,5                |
| Objectives                         | 4  | Provide an explicit statement of questions being addressed with reference to participants, interventions, comparisons, outcomes, and study design (PICOS).                                                                                                                                                  | 5                  |
| <b>METHODS</b>                     |    |                                                                                                                                                                                                                                                                                                             |                    |
| Protocol and registration          | 5  | Indicate if a review protocol exists, if and where it can be accessed (e.g., Web address), and, if available, provide registration information including registration number.                                                                                                                               | NA                 |
| Eligibility criteria               | 6  | Specify study characteristics (e.g., PICOS, length of follow-up) and report characteristics (e.g., years considered, language, publication status) used as criteria for eligibility, giving rationale.                                                                                                      | 6, 7               |
| Information sources                | 7  | Describe all information sources (e.g., databases with dates of coverage, contact with study authors to identify additional studies) in the search and date last searched.                                                                                                                                  | 6, 7               |
| Search                             | 8  | Present full electronic search strategy for at least one database, including any limits used, such that it could be repeated.                                                                                                                                                                               | 6                  |
| Study selection                    | 9  | State the process for selecting studies (i.e., screening, eligibility, included in systematic review, and, if applicable, included in the meta-analysis).                                                                                                                                                   | 6, 7               |
| Data collection process            | 10 | Describe method of data extraction from reports (e.g., piloted forms, independently, in duplicate) and any processes for obtaining and confirming data from investigators.                                                                                                                                  | 8                  |
| Data items                         | 11 | List and define all variables for which data were sought (e.g., PICOS, funding sources) and any assumptions and simplifications made.                                                                                                                                                                       | 8                  |
| Risk of bias in individual studies | 12 | Describe methods used for assessing risk of bias of individual studies (including specification of whether this was done at the study or outcome level), and how this information is to be used in any data synthesis.                                                                                      | NA                 |
| Summary measures                   | 13 | State the principal summary measures (e.g., risk ratio, difference in means).                                                                                                                                                                                                                               | 7                  |
| Synthesis of results               | 14 | Describe the methods of handling data and combining results of studies, if done, including measures of consistency (e.g., $I^2$ ) for each meta-analysis.                                                                                                                                                   | 8                  |

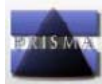

# PRISMA 2009 Checklist

| Section/topic                 | #  | Checklist item                                                                                                                                                                                           | Reported on page # |
|-------------------------------|----|----------------------------------------------------------------------------------------------------------------------------------------------------------------------------------------------------------|--------------------|
| Risk of bias across studies   | 15 | Specify any assessment of risk of bias that may affect the cumulative evidence (e.g., publication bias, selective reporting within studies).                                                             | NA                 |
| Additional analyses           | 16 | Describe methods of additional analyses (e.g., sensitivity or subgroup analyses, meta-regression), if done, indicating which were pre-specified.                                                         | NA                 |
| <b>RESULTS</b>                |    |                                                                                                                                                                                                          |                    |
| Study selection               | 17 | Give numbers of studies screened, assessed for eligibility, and included in the review, with reasons for exclusions at each stage, ideally with a flow diagram.                                          | Figure 1           |
| Study characteristics         | 18 | For each study, present characteristics for which data were extracted (e.g., study size, PICOS, follow-up period) and provide the citations.                                                             | Table 1            |
| Risk of bias within studies   | 19 | Present data on risk of bias of each study and, if available, any outcome level assessment (see item 12).                                                                                                | NA                 |
| Results of individual studies | 20 | For all outcomes considered (benefits or harms), present, for each study: (a) simple summary data for each intervention group (b) effect estimates and confidence intervals, ideally with a forest plot. | Table 3            |
| Synthesis of results          | 21 | Present the main results of the review. If meta-analyses are done, include for each, confidence intervals and measures of consistency.                                                                   | Tables 2-4         |
| Risk of bias across studies   | 22 | Present results of any assessment of risk of bias across studies (see Item 15).                                                                                                                          | NA                 |
| Additional analysis           | 23 | Give results of additional analyses, if done (e.g., sensitivity or subgroup analyses, meta-regression [see Item 16]).                                                                                    | NA                 |
| <b>DISCUSSION</b>             |    |                                                                                                                                                                                                          |                    |
| Summary of evidence           | 24 | Summarize the main findings including the strength of evidence for each main outcome; consider their relevance to key groups (e.g., healthcare providers, users, and policy makers).                     | 11                 |
| Limitations                   | 25 | Discuss limitations at study and outcome level (e.g., risk of bias), and at review-level (e.g., incomplete retrieval of identified research, reporting bias).                                            | 14, 16             |
| Conclusions                   | 26 | Provide a general interpretation of the results in the context of other evidence, and implications for future research.                                                                                  | 17, 18             |
| <b>FUNDING</b>                |    |                                                                                                                                                                                                          |                    |
| Funding                       | 27 | Describe sources of funding for the systematic review and other support (e.g., supply of data); role of funders for the systematic review.                                                               | 19                 |

From: Moher D, Liberati A, Tetzlaff J, Altman DG, The PRISMA Group (2009). Preferred Reporting Items for Systematic Reviews and Meta-Analyses: The PRISMA Statement. PLoS Med 6(6): e1000097. doi:10.1371/journal.pmed1000097

For more information, visit: [www.prisma-statement.org](http://www.prisma-statement.org).
